# Supplementary material for: Areca nut extracts mobilize calcium and release pro-inflammatory cytokines from various immune cells
Source: PubMed Central journal article supplement (PMC5773534; doi:10.1038/s41598-017-18996-2), 2018-01-18
Supplement: 41598_2017_18996_MOESM1_ESM.pdf [file 41598_2017_18996_MOESM1_ESM.pdf]

**Areca nut extracts mobilize calcium and release pro-inflammatory cytokines from various immune cells**

Malika Faouzi<sup>1\*</sup>, Ram P. Neupane<sup>2</sup>, Jian Yang<sup>3</sup>, Philip Williams<sup>2</sup>, Reinhold Penner<sup>1,4\*</sup>

<sup>1</sup> Center for Biomedical Research, The Queen's Medical Center, Honolulu, HI 96813

<sup>2</sup> Dept. of Chemistry, University of Hawaii, Honolulu, HI 96822

<sup>3</sup> College of Natural and Applied Sciences, University of Guam, Mangilao, Guam 96923

<sup>4</sup> Cancer Biology Program, University of Hawaii Cancer Center, Honolulu, HI 96813

\* Correspondence should be addressed to: Reinhold Penner or Malika Faouzi, The Queen's Medical Center, Center for Biomedical Research, 1301 Punchbowl St., Honolulu, HI 96813, U.S.A. e-mails: rpenner@hawaii.edu, mfaouzi@hawaii.edu

## Supplementary Figure 1

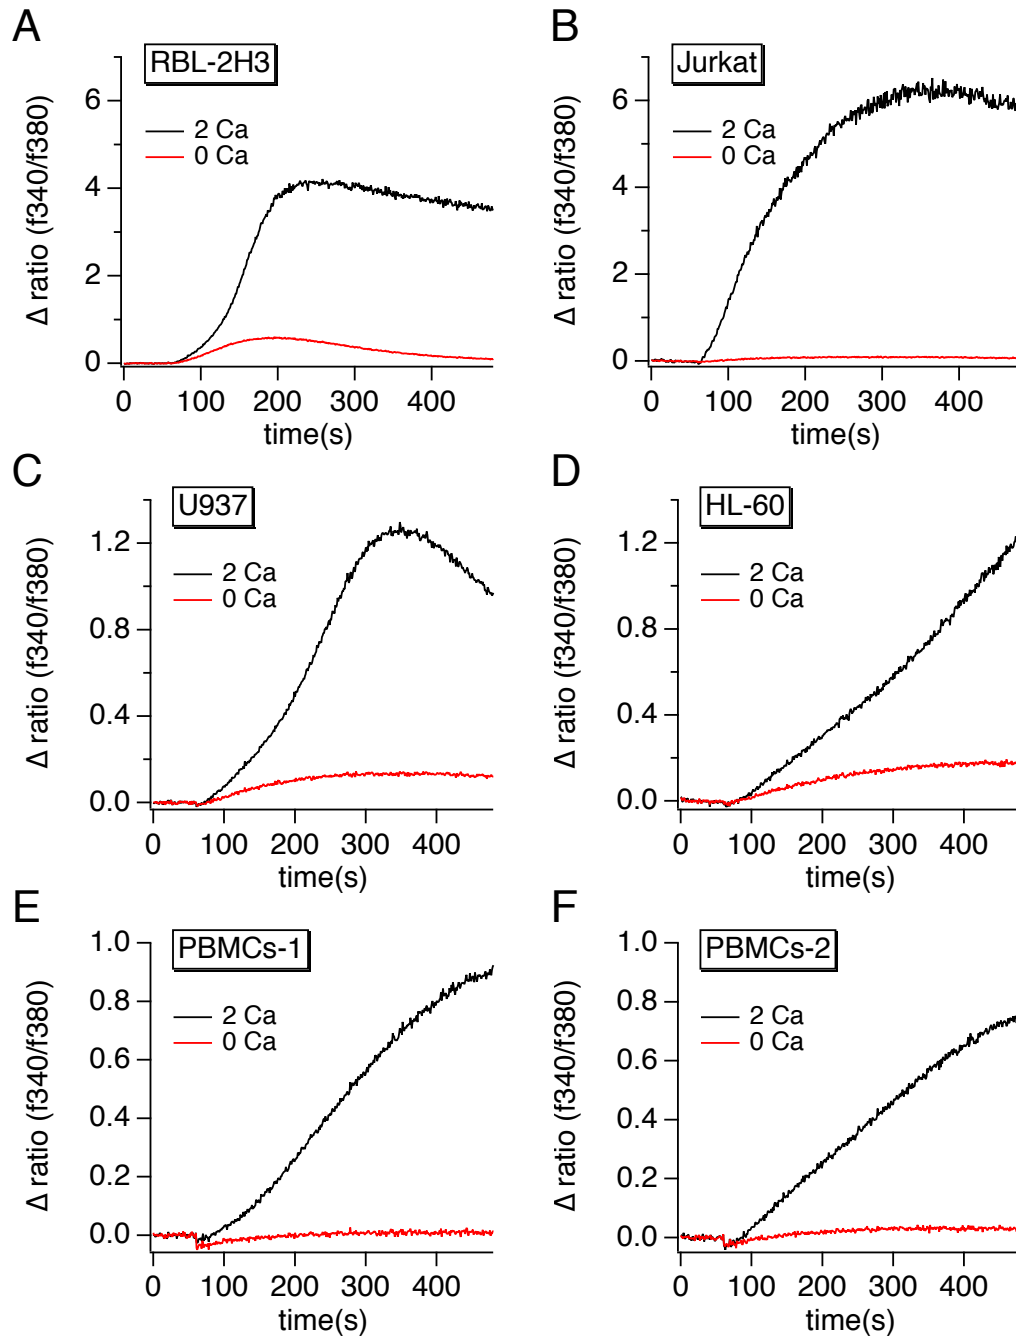

**Supplementary Figure 1: SOCE signature in various immune cells.** Thapsigargin-induced SOCE signals in RBL-2H3 rat mast cells (**A**), Jurkat human T cells (**B**), U937 human monocytes (**C**), HL-60 human neutrophils (**D**) and human primary Peripheral Blood Mononuclear Cells (PBMCs) from two different sources; PBMCs-1 from Lonza (**E**) and PBMCs-2 from Stemcell Technologies (**F**). The signals were recorded in the

presence (2 Ca) or absence (0 Ca) of 2 mM external calcium, representing SOCE and calcium release signals, respectively.
